# Supplementary material
Source: PubMed Central journal article supplement (PMC10461359)

**Supplemental Fig. 1: Alanine is not critical for the activation of hepatic stellate cells.** **a**, LX2 cells activated by TGF $\beta$ -1 (5 ng/mL) and treated with or glutamine (2 mM) or three doses of alanine (1, 2, or 5 mM). *COL1A1*, *COL1A2*, and *COL3A1* gene expression measured by RT-qPCR and expressed as mean  $\pm$  SEM, relative to TGF $\beta$ -1-free cells. **b**, Western blot images for COL1A1, HIF1 $\alpha$ , and  $\beta$ -Actin in LX2 cells treated with Gln and HIF1 $\alpha$  inhibitor, CAY10585. **c**, The mRNA abundance of *HIF1A* in TGF $\beta$ -1-activated LX2 cells expressing scramble or MPC2 shRNA and data expressed as mean  $\pm$  SEM, relative to TGF $\beta$ -1-free scramble-shRNA cells. ns, non-significant, \* $p < 0.05$ , \*\* $p < 0.01$ , \*\*\* $p < 0.001$ , \*\*\*\* $p < 0.0001$ .

**Supplemental Fig. 2: Stellate cell-specific deletion of *Mpc2* blunts HSC activation in vitro.** *Col1a1*, *Col3a1*, *Acta2*, *Timp1*, *Serpine1*, and *Mpc2* gene expression of isolated hepatic stellate cells (HSC) from wild-type *Mpc2*<sup>fl/fl</sup> mice and MPC2<sup>-/-</sup> littermates that cultured for up to 7 days (Day7). A portion were harvested after 1 day of culture (Day1) for quiescent HSC. Gene expression was measured by RT-qPCR and data are expressed as mean  $\pm$  SEM, relative to day1 HSC. \*\* $p < 0.01$ , \*\*\*\* $p < 0.0001$ .

**Supplemental Fig. 3: Plasma lipids were not affected in Lrat-MPC2<sup>-/-</sup> mice fed a MASH-inducing diet.** At about 8 weeks of age, littermate wild-type (WT) and Lrat-MPC2<sup>-/-</sup> (KO) mice were placed on either a low-fat diet (LFD) or a diet high in fat, fructose, and cholesterol (HFC) for a period of 12 weeks. **a**, Liver weight, measured at sacrifice, and body composition, determined by EchoMRI, expressed as mean  $\pm$  SEM (n=7-11/group). **b**, Histological scoring of H&E-stained liver sections assessing steatosis, macrosteatosis, lobular inflammation, and NAFLD activity score expressed as mean  $\pm$  SEM (n=6-7/group). **c,d**, Analysis of triglycerides

(TG), total cholesterol (TC), and non-esterified fatty acids (NEFA) from liver (**c**) and plasma (**d**), expressed as mean  $\pm$  SEM (n=7-11/group).

**Supplemental Fig. 4: Diminished expression of HIF1 $\alpha$  target genes in Lrat-Mpc2<sup>-/-</sup> mice on HFC diet.** RNA sequencing was performed on liver tissue from both wild-type (WT) and Lrat-Mpc2<sup>-/-</sup> (KO) mice and placed on either a LFD or HFC diet (n=5/group). Selected HIF1 $\alpha$  target genes from RNAseq data expressed as counts per million (CPM) and represented as mean  $\pm$  SEM (n=5/group).

# Supplemental Fig. 1

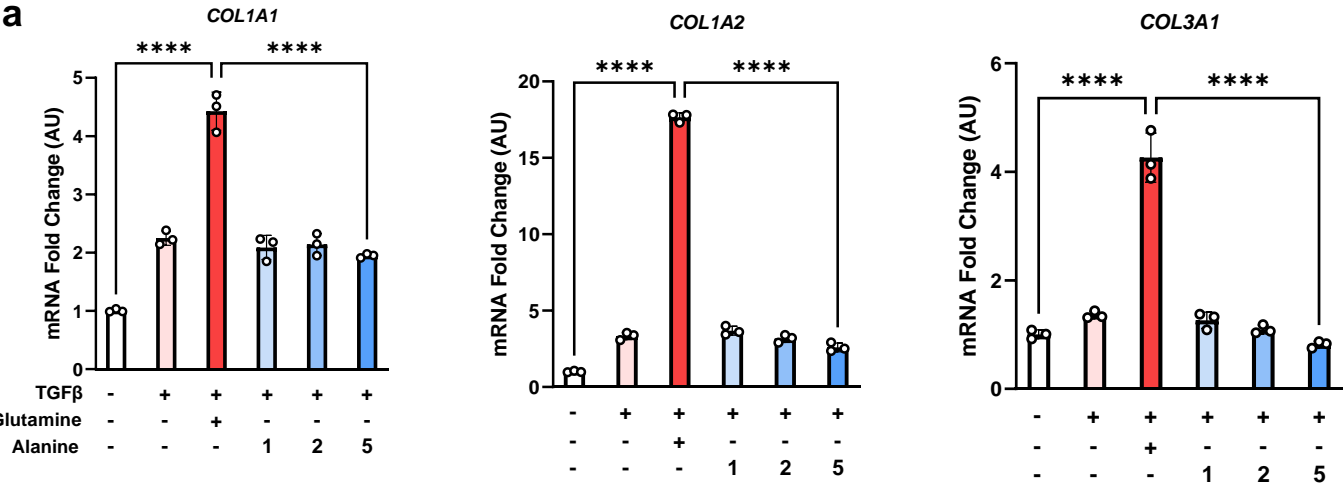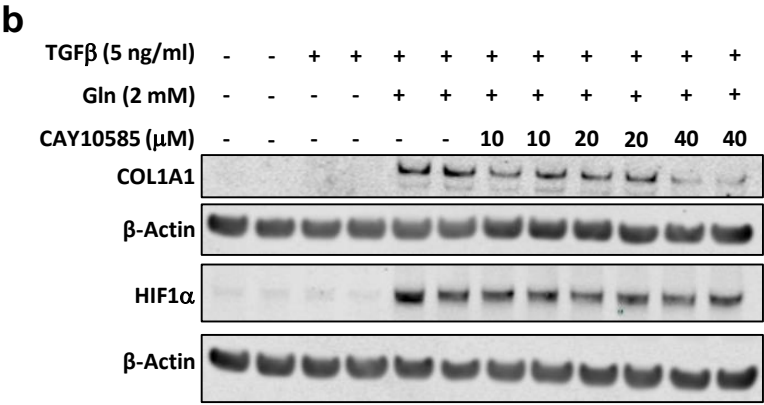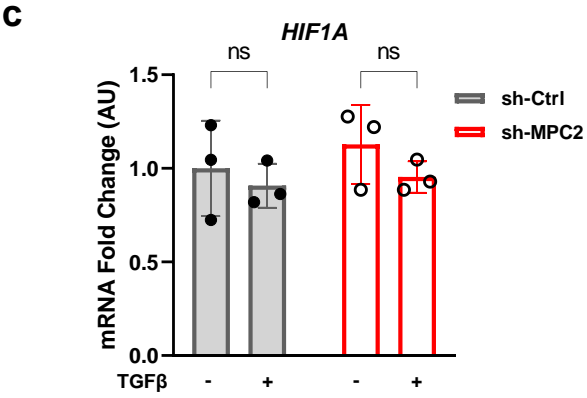

# Supplemental Fig. 2

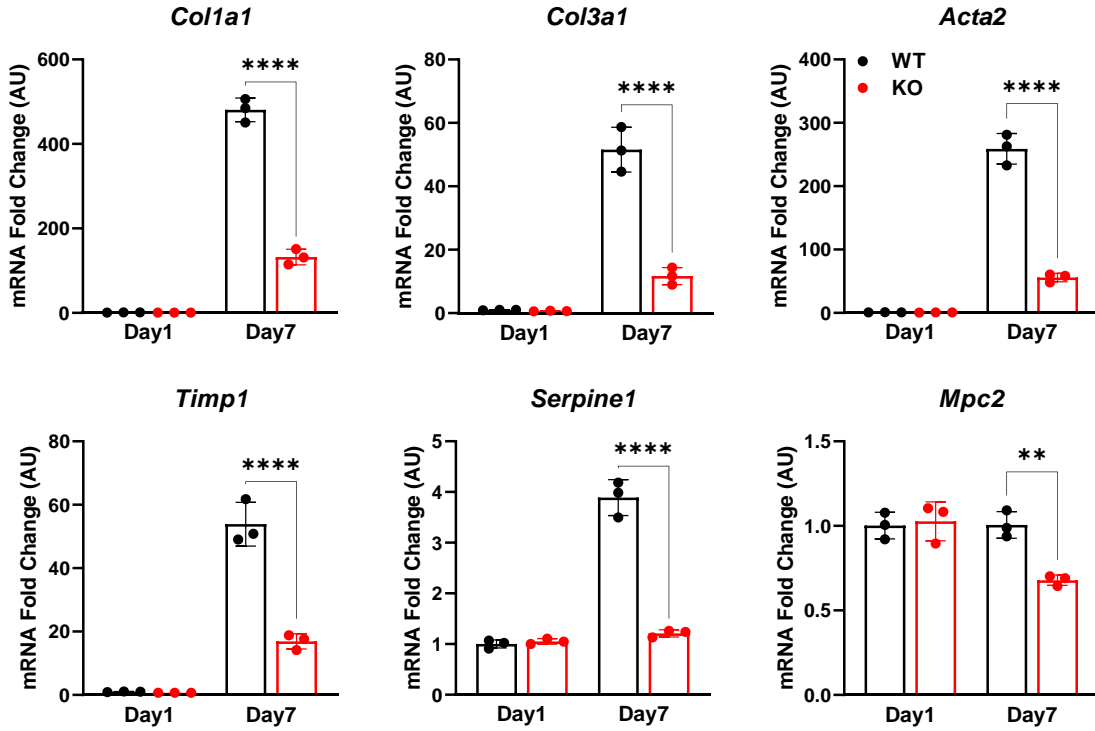

# Supplemental Fig. 3

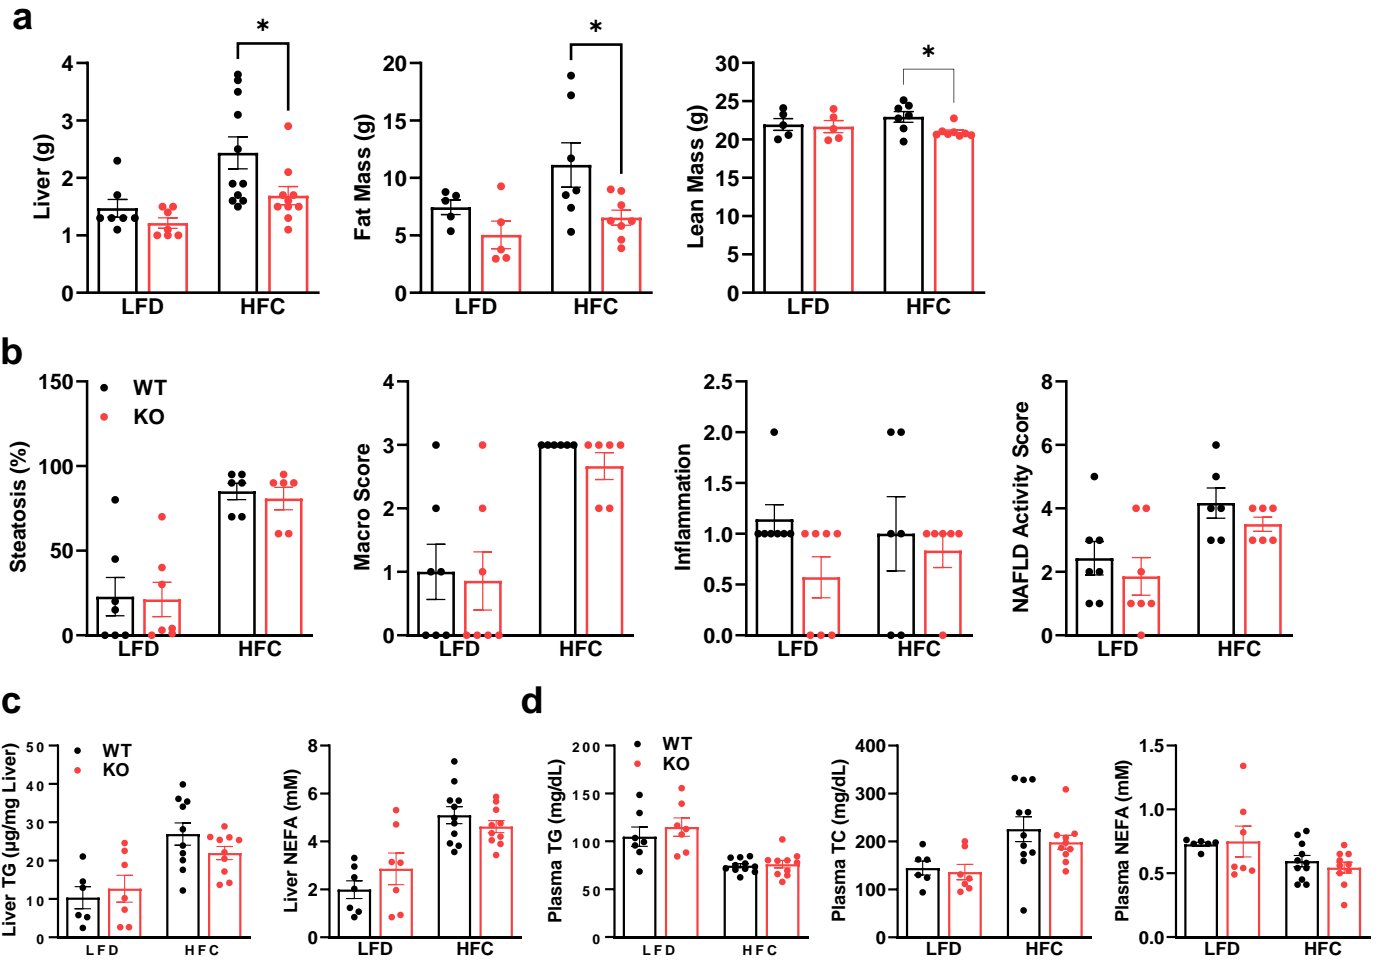

# Supplemental Fig. 4

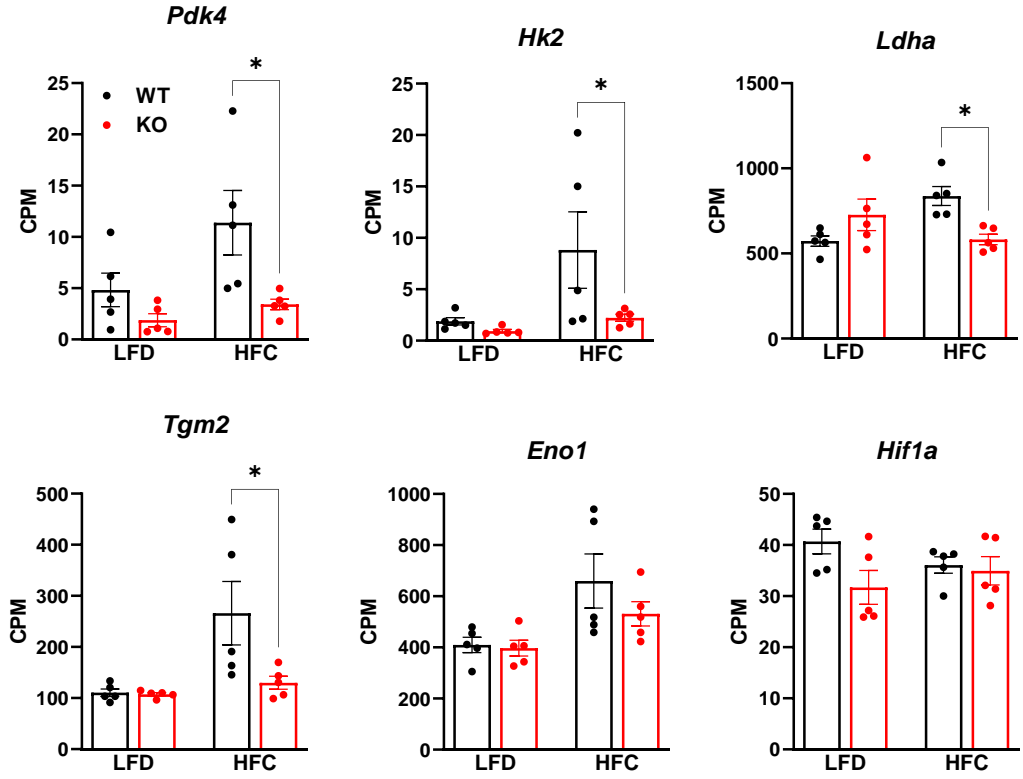

Supplement: NIHPP2023.02.13.528384v2-supplement-1.pdf [file NIHPP2023.02.13.528384v2-supplement-1.pdf]
